# Supplementary material for: Emergence of belief-like representations through reinforcement learning
Source: PubMed Central journal article supplement (PMC10104054; doi:10.1101/2023.04.04.535512), 2023-04-04
Supplement: NIHPP2023.04.04.535512v1-supplement-1.pdf [file NIHPP2023.04.04.535512v1-supplement-1.pdf]

## Supplemental Figures

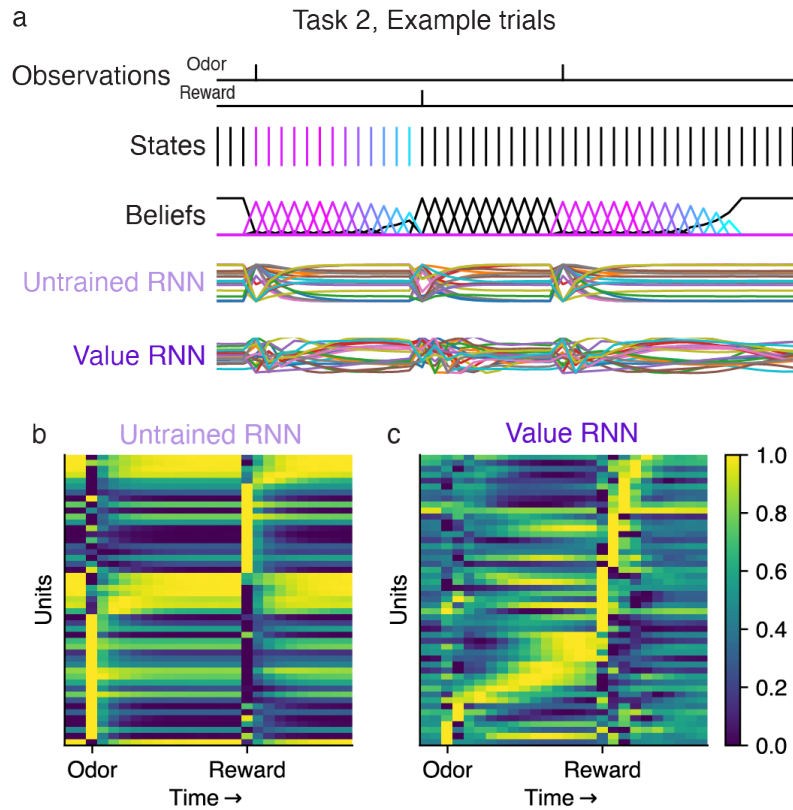

**Fig S1. RNN activity before and after training on Starkweather Task 2.** **a.** Observations, states, beliefs, and RNN activations on two example trials from Task 2. **b-c.** RNN unit activity (individually normalized to span between 0 and 1), with units sorted by time of peak activation on held-out trials, on an RNN before (panel **b**) and after (panel **c**) training. Both before and after after training, RNN units exhibited tuning to elapsed time following observations, with variance that scaled with elapsed time.

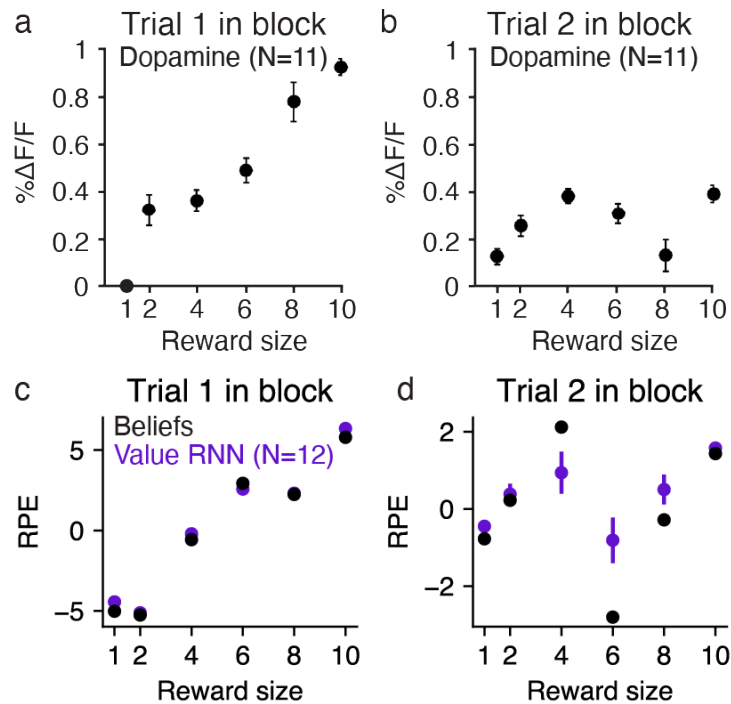

**Fig S2. Value RNNs trained on the Babayan task recapitulate dopamine activity and belief RPEs in response to intermediate reward sizes.** **a-b.** Average dopamine response on trial 1 (panel **a**) and trial 2 (panel **b**) during probe sessions including blocks with intermediate reward sizes. Circles and lines depict mean  $\pm$  SE across  $N = 11$  animals. Reproduced from Babayan et al. [10]. **c-d.** Same as panels **a-b**, but for the RPEs of the Belief model (black) and Value RNNs (purple). Value RNNs were trained on sessions including only blocks with rewards  $r_t \in \{1, 10\}$ , as in the main text. Value weights for the Belief model and Value RNNs were fit using a test session including 39 blocks each with  $r_t = 1$  and  $r_t = 10$ , and 3 blocks each with  $r_t \in \{2, 4, 6, 8\}$ , similar to the proportions used in Babayan et al. [10]. RPEs were then measured on a different test session. Purple circles and lines depict mean  $\pm$  SE across  $N = 12$  models.

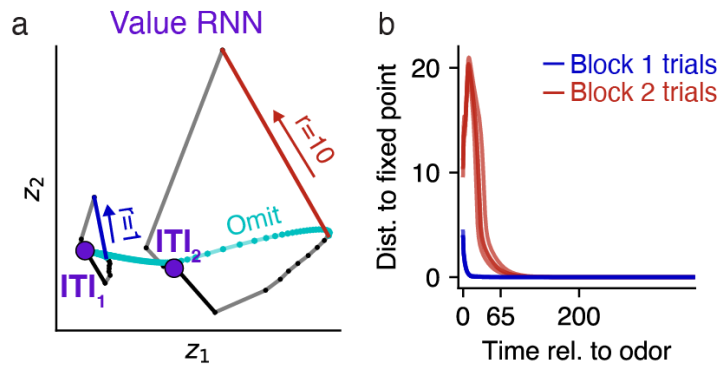

**Fig S3. Value RNNs trained on the Babayan task exhibit one fixed point.** **a.** RNN activity during two example trials, one during Block 1 (left) and the other during Block 2 (right). Same as Fig 7D. Here we also include RNN activity trajectories if each reward had been omitted. While activity for the Block 2 trial initially returns to the putative  $ITI_2$  state, it eventually returns to the true fixed point at  $ITI_1$ . **b.** Distance of RNN activity from the single fixed point (e.g.,  $ITI_1$  in panel **a**) following an odor observation (i.e., an omission trial). While the maximum ITI duration is theoretically infinite, the maximum ITI duration in the training data was at  $t = 65$ . RNN activity on Block 2 trials therefore remained separate from the activity on Block 1 trials for the range of experienced ITI durations.
